1 **Graded behavioral responses and habituation to sound in the common cuttlefish, *Sepia***  
2 ***officinalis***

3

4 Julia E. Samson<sup>1,2</sup>, T. Aran Mooney<sup>1,3\*</sup>, Sander W. S. Gusseklou<sup>2</sup>, Roger T. Hanlon<sup>3</sup>

5

6 <sup>1</sup>Biology Department, Woods Hole Oceanographic Institution, Woods Hole, MA 02543, USA

7 <sup>2</sup>Experimental Zoology Group, Wageningen University, De Elst 1, 6708WD Wageningen, The

8 Netherlands

9 <sup>3</sup>Program in Sensory Physiology and Behavior, Marine Biological Laboratory, Woods Hole,

10 MA, 02543, USA

11

12 \* Author for correspondence (e-mail: [amooney@whoi.edu](mailto:amooney@whoi.edu))

13

14

15 Keywords: bioacoustics, cephalopod, hearing, noise, loudness, invertebrate, ear, statocyst, lateral

16 line

17

18 Short title: Cuttlefish behavioral responses to sound

19

20

21 List of symbols and abbreviations:

22 fps frames per second

23 rms root mean square

24 SPL sound pressure level

25

1  
2  
3  
4  
5  
6  
7  
8  
9  
10  
11  
12  
13  
14  
15  
16  
17  
18  
19  
20  
21  
22

## SUMMARY

Sound is a widely available and vital cue in aquatic environments yet most bioacoustic research has focused on marine vertebrates, leaving sound detection in invertebrates poorly understood. Cephalopods are an ecologically key taxon that likely use sound and may be impacted by increasing anthropogenic ocean noise, but little is known regarding their behavioral responses or adaptations to sound stimuli. These experiments identify the acoustic range and levels that elicit a wide range of secondary defense behaviors such as inking, jetting, and rapid coloration change. Secondly, it was found that cuttlefish habituate to certain sound stimuli. The present study examined the behavioral responses of 22 cuttlefish (*Sepia officinalis*) to pure-tone pips ranging from 80-1000 Hz with sound pressure levels of 85–188 dB re 1  $\mu$ Pa rms and particle accelerations of 0-17.1  $\text{m}\cdot\text{s}^{-2}$ . Cuttlefish escape responses (inking, jetting) were observed between frequencies of 80-300 Hz and at sound levels above 140 dB re 1  $\mu$ Pa rms and 0.01  $\text{m}\cdot\text{s}^{-2}$  (0.74  $\text{m}\cdot\text{s}^{-2}$  for inking responses). Body patterning changes and fin movements were observed at all frequencies and sound levels. Response intensity was dependent upon stimulus amplitude and frequency, suggesting that cuttlefish also possess loudness perception with a maximum sensitivity around 150 Hz. Cuttlefish habituated to repeated 200 Hz tone pips, at two sound intensities. Total response inhibition was not reached, however, and a basal response remained present in most animals. The graded responses provide a loudness sensitivity curve and suggest an ecological function for sound-use in cephalopods.

# 1 INTRODUCTION

2 Sound in aquatic environments is a widely available cue that many marine vertebrates use  
3 during vital biological activities such as foraging, predator detection, mate attraction, and habitat  
4 selection (Webster et al., 1992; Fay and Popper, 1998; Au et al., 2000). Consequently, for  
5 vertebrates, sound detection is considered a primary sensory modality and an important  
6 component of vital intraspecific interactions and a key way to detect the surrounding  
7 environment. The ability of marine invertebrates to detect and potentially use sound is far less  
8 understood (Budelmann, 1992a, b; Mooney et al., 2012). This is somewhat surprising given their  
9 relative abundance and central role in many marine ecosystems.

10 Yet a growing body of literature suggests that marine invertebrates respond to sound in a  
11 variety of ways. For example, coral reef invertebrates (crabs and coral larvae) may swim toward  
12 or away from reef sounds, with the actual direction being taxon specific (Vermeij et al., 2010;  
13 Simpson et al., 2011). Reef sounds from certain habitats can generate settlement behaviors and  
14 increased rates of metamorphosis (Stanley et al., 2009, 2012). Perhaps not surprisingly,  
15 variations in the frequencies and levels of these sounds can affect whether the behavior is  
16 induced (Simpson et al., 2011; Stanley et al., 2011). However, thresholds have rarely been  
17 established and we still know little regarding the frequencies to which most invertebrates  
18 respond. Furthermore, it is vital to quantify acoustic particle motion, a stimulus often  
19 overlooked. Both sound pressure and acoustic particle motion are generated by sound sources,  
20 but it is particle motion [i.e., the back-and-forth hydrodynamic flow from the motion of the  
21 sound emitter (Gade, 1982; Au and Hastings, 2009)] that is the likely stimulus for most marine  
22 animals without compressible air cavities (Mann et al., 2007; Mooney et al., 2010; Popper and  
23 Fay, 2011). Despite a burgeoning literature, there is a poor understanding of the frequencies and  
24 levels of sounds that generate functional behavioral responses in invertebrates.

25 Cephalopods offer a unique means to quantify the frequency range and sound levels that  
26 generate behavioral responses for several reasons. First, the potential behavioral responses of  
27 several species, such as the common cuttlefish, *Sepia officinalis* L., 1758, are both dynamic and  
28 well described (Hanlon and Messenger, 1996). Previous behavioral studies have shown that these  
29 cuttlefish exhibit a range of responses to sensory stimuli, including changes in body patterning,  
30 locomotor activity, jetting and inking events (Hanlon and Messenger, 1996). Secondly, these  
31 behavioral responses show a gradation in intensity, from primary defense responses (usually

1 crypsis or camouflaging against the background) to secondary defenses such as deimatic  
2 behaviors used to deter the potential predator and ultimately flight responses involving jetting  
3 and inking (Hanlon and Messenger, 1998; Langridge et al., 2007; Langridge, 2009; Staudinger et  
4 al., 2011). A similar gradation in response intensity may be generated by acoustic stimuli  
5 (Fewtrell and McCauley, 2012 ). Finally, many cephalopods occupy central positions in food  
6 chains; thus, understanding their sensory ecology is required to accurately determine  
7 relationships between this taxon and other marine species, and could provide indications on how  
8 other invertebrates may use sound.

9         The statocyst is generally considered the primary sound detection organ in cephalopods  
10 (Budelmann, 1990, 1992a), although peripheral hair cells may play a role in detecting local water  
11 movements (Bleckmann et al., 1991; Coombs et al., 1992). With regard to acoustic stimuli, the  
12 statocyst likely acts as an accelerometer in response to the vibratory particle motion component  
13 of sound (Budelmann, 1990; Packard et al., 1990; Mooney et al., 2010). Besides the hair cells in  
14 the statocysts, common cuttlefish also have eight lines of epidermal hair cells running over their  
15 head and arms which are able to detect local water movements generated by a vibrating sphere  
16 (Budelmann and Bleckmann, 1988; Komak et al., 2005).

17         There is some anecdotal evidence suggesting that cephalopods respond to sounds such as  
18 tapping on the tank wall (Baglioni, 1910; Dijkgraaf, 1963). Other observational evidence  
19 includes cephalopods swimming away from sound-generating predators in the sea (Hanlon and  
20 Budelmann, 1987). More recently, conditioned responses were generated in common octopus  
21 (*Octopus vulgaris*), squid (*Loligo vulgaris*) and cuttlefish (*S. officinalis*) using low frequency  
22 acceleration stimuli (Packard et al., 1990). Juvenile *S. officinalis* exhibited body patterning  
23 changes and locomotor responses when exposed to water movements ranging between 0.01 and  
24 1000 Hz (Komak et al., 2005), and octopus showed changes in respiratory rates when presented  
25 sound stimuli between 50 and 150 Hz (Kaifu et al., 2007). Furthermore, there are suggestions  
26 that anthropogenic noise may impact cephalopod behavior or anatomy (André et al., 2011;  
27 Fewtrell and McCauley, 2012). Understanding the frequency ranges and sound levels that  
28 generate behavioral responses, whether they adapt (habituate) and the types of behavioral  
29 responses elicited would help evaluate the likely influences of noise on cephalopods.

30

1 Accordingly, the aim of this study was to quantify the sounds that generate behavioral  
2 responses and identify the potential behaviors elicited. Animals were presented tones that varied  
3 in both frequency and sound level, and response types were quantified. The three main goals  
4 were to: (1) determine the frequency range and sound levels to which behavioral responses are  
5 observed, (2) describe and quantify the types of responses and their occurrence rates, and (3)  
6 investigate the potential for habituation to repeated sound stimuli. In addressing these goals, both  
7 sound pressure and particle acceleration were quantified.

## 8 9 **RESULTS**

### 10 11 **Acoustic frequency range and sensitivity**

12 All animals showed clear behavioral responses to acoustic stimuli (Figs. 1, 2), and the  
13 intensity of the response was associated with the amplitude and the frequency of the signal.  
14 Multiple response types were elicited (Table 1). Responses occurred at all frequencies tested;  
15 occurrence rates and response types were dependent upon both the frequency and sound level  
16 received (Fig. 1). Some individual variations in response intensities were observed but the  
17 general pattern of response intensities was conserved. Greatest intensity responses (i.e., inking;  
18 Fig. 2) were found at the highest sound levels, typically between 100 and 300 Hz. As sound  
19 levels got lower, response intensity decreased to jetting, startle, large body patterning changes  
20 and/or fast fin movements, and small body patterning changes and/or slow fin movements. The  
21 controls most often showed “no response,” but small and large fin movements and/or body  
22 pattern changes were also observed. These responses were more often noted in the more active  
23 animals. More frequently, these animals would swim and change body pattern in their housing  
24 tanks (outside of the experiments) where they might interact with other animals and respond to  
25 prey presentation during feedings. Inking, jetting and startle were not observed in the controls.

26 The sound parameter matrix did not take into account the distance between the animal  
27 and the speaker, meaning that the sound levels in Fig. 1 are the calibrated sound levels at 20 cm  
28 from the speaker, not the sound levels actually received by the animal. This resulted in  
29 discrepancies in the observed pattern of response intensities. For example, small body pattern  
30 changes and/or slow fin movements are often placed at higher sound levels than big body pattern  
31 changes and/or fast fin movements (Fig. 1).

1            Corrections for the distance between the animal and the speaker were made and the  
2 behavioral responses were plotted relative to the actual received particle acceleration (Fig. 3) for  
3 each sound trial (pressure data are shown in the Supplementary Material). Only the most intense  
4 response for each trial was plotted; i.e., if the animal showed several responses during a test, only  
5 the highest scoring response was plotted (inking in the case of Fig. 2). Cuttlefish escape  
6 responses (inking, jetting, startle) were highly dependent on the sound frequency and level.  
7 Inking was only observed for sounds between 80 and 300 Hz, and above  $0.73 \text{ m.s}^{-2}$  (particle  
8 acceleration) and 140 dB (sound pressure level – SPL - presented in dB re  $1 \mu\text{Pa rms}$ ). Jetting  
9 and startle responses were observed primarily between the same frequencies, with occasional  
10 incidences at higher frequencies. These responses also occurred predominantly above  $0.01 \text{ m.s}^{-2}$   
11 (above 140 dB) with a few occurrences at lower sound levels, stretching the range of particle  
12 acceleration eliciting those responses by an order of magnitude compared to inking. No escape  
13 responses were observed below particle accelerations of  $3.3 \times 10^{-3} \text{ m.s}^{-2}$  or 110 dB. Less intense  
14 responses (body patterning changes and fin movements) were more widespread along both the  
15 frequency and sound intensity range and had much lower mean acceleration levels (dashed lines  
16 in Fig. 3 and SM1). The less intense responses were seen at acceleration levels down to  $4 \times 10^{-4}$   
17  $\text{m.s}^{-2}$  and sound pressure levels as low as 85 dB. The absence of response (no response) was  
18 typically found at lower sound levels, similar to the levels eliciting body patterning changes and  
19 fin movements.

20            The mean sound pressure level and particle acceleration eliciting behavioral responses  
21 was not constant over the frequency range (Fig. 4). The lowest sound levels eliciting a response  
22 were found at 150 Hz, regardless of whether they were measured as particle acceleration or  
23 sound pressure. At this frequency, animals demonstrated responses to sound stimuli at a mean  
24 particle acceleration of  $0.025 \text{ m.s}^{-2}$  (and mean SPL of 124 dB), and the elicited response was a  
25 small body patterning change and/or small fin movement. The absolute lowest sound levels  
26 eliciting a response at 150 Hz were  $4 \times 10^{-4} \text{ m.s}^{-2}$  and 85 dB; the observed behavior in these cases  
27 was a small body patterning change and/or fin movement. On the other hand, 1000 Hz and 700  
28 Hz required relatively high sound levels to elicit responses from the animals (Figs. 1, 4).

29            There were no changes in response rates while the animals were subject to the conditions  
30 in the matrix (including across the eleven consecutive days or within single test days with four  
31 tests per day, at least 20 minutes between each test). For example, we were concerned that

1 animals might have reacted less at the end of the two weeks of testing (i.e. a cuttlefish getting a  
2 300 Hz/140 dB sound on day 3 might react more than a cuttlefish getting that same sound on day  
3 10 because the latter had already been exposed to multiple tones for nine days). However,  
4 response types and occurrences showed no consistent pattern with respect to the order of sound  
5 presentations. This suggests that: (1) cuttlefish behaviors were not influenced by the prior  
6 exposures. Thus, it is possible the animals did not learn or otherwise anticipate the sound  
7 presentation when signals were presented in this randomized order and schedule. (2) The  
8 repeated sound presentations did not impact their hearing enough to change their responses.  
9 Consequently, individual sound presentations were considered independent trials.

10

### 11 **Habituation to repeated sounds**

12 While response rates did not change in the random matrix, which spread sound trials over  
13 several days, habituation to acoustic stimuli was observed when identical sounds were presented  
14 closer in time. When tones of the same source level and frequency were presented every minute  
15 for 30 min, the number of animals showing escape responses (inking and jetting) decreased  
16 logarithmically as the number of repeated stimuli increased (Fig. 5). This was true for both  
17 higher and lower sound levels although higher sound levels tended to reflect less variation in the  
18 number of animals responding and, correspondingly, higher regression-based  $r^2$  values (Table 2).  
19 For example, inking response occurrence rates were significantly related to trial number for both  
20 the higher and lower sound levels, but higher sound levels produced a higher  $r^2$  value ( $r^2$  for high  
21 and low sound levels were 0.60 and 0.42, respectively; see Table 2). Jetting responses, also tied  
22 to trial number, occurred more often in the early trials, allowing for a steeper decline in response  
23 rates for both high and low sound levels. Occurrence rates decreased significantly with increased  
24 trial number ( $r^2$  for high and low sound levels were 0.72 and 0.70, respectively). Similar trends  
25 were seen for the large body patterning changes as well, but with greater overall variation ( $r^2 =$   
26 0.25 at the higher sound level;  $r^2 = 0.49$  at the lower sound level). Startle responses, fin  
27 movements, and smaller body patterning changes showed reverse trends with slight increases in  
28 occurrence rates as trial number increased. This was likely because the escape responses tended  
29 to dominate at the beginning of test series (only the highest scoring behavior was taken into  
30 account for each trial); as trial number increased and habituation set in, the lower intensity  
31 responses became more prevalent.

1           The differences in particle acceleration shown in Fig. 6 provide an indication of the  
2 movements of the animal because the received acceleration level depended on the distance of the  
3 animal to the speaker. Cuttlefish often settled themselves near the speaker, at the bottom of the  
4 netted space, so the first trial of each test series tended to be at a relatively high received level  
5 (Fig. 6A, black symbols). The animal in Fig. 6A then moved higher in the water column, away  
6 from the speaker, and received a relatively lower sound level in the second trial (the particle  
7 acceleration is lower). The cuttlefish subsequently moved around in the tank and finally settled  
8 back down after 5 to 10 exposures (reflected in the more or less constant sound level from trial  
9 10 onward). This pattern is also noticeable in the lower part of Fig. 6A and in Fig. 6B.

10           Total response inhibition was never reached; individuals repeatedly exhibited a  
11 “stereotyped startle” response. The order in which the sounds were presented (i.e., higher  
12 intensity sound on the first or second test day) and the age of the animals did not have an effect  
13 on the observed decrease in response type. Greater variation in the responses given by different  
14 animals was also seen in the early trials, but sound levels were also more variable as the animal  
15 tended to move around in the sound field as a result of the acoustic stimuli.

## 16 17 **DISCUSSION**

### 18 19 **Acoustic frequency range and sensitivity**

20           A primary aim of this research was to address the frequency range and sound levels that  
21 induce behavioral responses in a cephalopod, the common cuttlefish. This work provides the  
22 only unconditioned, sound-mediated behavioral response data set for cephalopods, and the only  
23 work that describes both the range and sensitivity of such responses for marine invertebrates.  
24 The data may be applicable for evaluating the auditory scene that some cephalopods may utilize,  
25 and help define the noise conditions that may impact these animals.

26           The sound levels generating behavioral responses in this study were quite low, often  
27 lower than the physiological thresholds previously measured in cephalopods. Body pattern  
28 changes and fin movements were observed at the lowest sound levels, lower  $10^{-4}$  m.s<sup>-2</sup> and down  
29 to 85 dB. Neurophysiological responses in longfin squid and common octopus were generated  
30 using slightly higher amplitude signals [between  $10^{-3}$  to  $10^{-4}$  m.s<sup>-2</sup> (Kaifu et al., 2008; Mooney et  
31 al., 2010)]. The differences between physiology and behavior results could reflect that the



1 evoked potential methods are not as sensitive as the animal's auditory system and these  
2 behavioral metrics. Or there could be taxonomic based differences as this study used cuttlefish,  
3 while Kaifu et al., (2007; 2008) and Mooney et al., (2010; 2012) used octopus and squid species.  
4 Yet, Packard et al., (1990) used classical conditioning to address *S. officinalis* sound detection  
5 and response thresholds were still two orders of magnitude higher than here. This suggests that *S.*  
6 *officinalis* is more sound-sensitive than previously thought. Furthermore, the unconditioned  
7 method used here provides a robust way to address the behavioral response range and apparent  
8 sensitivity for this species.

9         The overall frequency range and upper limit that generated responses was somewhat  
10 greater than previous acceleration-based cephalopod sound detection studies (Packard et al.,  
11 1990; Kaifu et al., 2008; Mooney et al., 2010), but results were similar to those of many fish  
12 without auditory specializations (Popper and Fay, 2011). This reinforces the notion that  
13 cephalopods, like many fish, have an accelerometer-like “auditory” system that detects the  
14 particle motion component of sound stimuli. Furthermore, cephalopod auditory scenes and sound  
15 use may be very similar to fish without specializations.

16         Mean response levels fluctuated with stimulus frequency. To some extent, this may be  
17 the result of greater sensitivities at lower frequencies. These variations may also be due to sound  
18 reflections and interferences linked to the size of our experimental tank. In small tanks, sound  
19 does not attenuate as in the free field, and despite the detailed calibrations conducted here it is  
20 impossible to determine the exact levels received by a moving animal for every location within  
21 the tank. However, the variations may also reflect individual differences in auditory or  
22 behavioral response thresholds. Such variation was evident from general observations of the  
23 animals and is reflected within the individual data (e.g. Fig. 6).

24         The occurrence of escape responses was strongly linked to the characteristics of the  
25 sound stimulus. For example, inking was only found at lower frequencies and higher sound  
26 intensities. Jetting was also only found at the higher sound levels. Yet all stimuli had relatively  
27 rapid rise times and short onsets of the stimuli (tens of ms) suggesting these were not vital to  
28 inducing the escape responses. The link to sound intensity suggests that sound level could  
29 provide some behavioral relevance to the animals, and that higher levels infer closer predators,  
30 thus inducing the escape behaviors. More basically, sound detection could be a mechanism for  
31 predator detection in these animals. This idea of predator detection is reinforced by the

1 observation of deimatic displays to some of the acoustic stimuli. The deimatic display is usually  
2 elicited by visual stimuli, e.g. a model of a predator (King and Adamo, 2006; Cartron et al.,  
3 2013) or an actual predator (Langridge et al., 2007), with the purpose of deterring said predator.  
4 The observation of deimatic displays in the absence of a visual stimulus suggests that sound  
5 could play a role in predator detection by cuttlefish, as surmised by Hanlon and Budelmann  
6 (1987).

7         The behaviors exhibited were clustered relative to frequency and received levels (Fig. 3).  
8 Higher levels and lower frequencies induced escape responses (as noted above) and more  
9 moderate responses (body pattern changes and fin movements) were observed at lower sound  
10 levels and higher frequencies. This trend generally follows what we know regarding cephalopod  
11 hearing: they detect lower frequencies better, suggesting a sensation level response curve for  
12 these behaviors. The clustering also indicates a potential for the perception of loudness in the  
13 common cuttlefish (and perhaps other cephalopods); that is, the behavioral response curves  
14 (Figs. 4, 5) could be taken as preliminary loudness sensitivity measures. As in several other  
15 studies (Stebbins, 1966; Kastelein et al., 2011), these assessments would be subjective and based  
16 on certain response characterizations, and would probably not be as accurate as protocols aimed  
17 specifically at generating loudness curves (Finneran and Schlundt, 2011). Yet, *S.officinalis*  
18 appears to differentially respond to acoustic stimuli based upon relative perceived sound levels,  
19 not solely absolute values.

20         Overall, the dynamic range of potential responses that cuttlefish can generate in response  
21 to acoustic stimuli are relatively well characterized in regard to their behavioral and ecological  
22 relevance in other contexts (Hanlon and Messenger, 1996). These prior descriptions of behaviors  
23 and the clarity of the responses seen during this study indicate cuttlefish are a suitable subject for  
24 future bioacoustic studies.

25

### 26 **Habituation to repeated sounds**

27         All tested cuttlefish showed habituation to repeated stimuli. Habituation was noted by a  
28 logarithmic decrease in the occurrences of certain responses over the course of 30 exposures (30  
29 min) of repeated 200 Hz tone stimuli. This decrease was notable in the more dramatic escape  
30 responses (inking and jetting), and for large body patterning changes; this pattern of habituation  
31 is similar to that reported in the squid *Lolliguncula brevis* (Long, et al, 1989). It was significant

1 across both sound levels, suggesting the robustness of this form of habituation. The decrease in  
2 response intensity was more marked at lower sound intensities; this is in agreement with one of  
3 the characteristics of habituation described by Rankin et al. (2009): weaker stimuli generate more  
4 rapid and/or more pronounced habituation.

5         Similar to the first experiment, escape responses were initiated by relatively higher  
6 intensity stimuli (likely of greater sensation level); but in this experiment, earlier signals also  
7 showed a greater response rate. These evasion responses suggests that the cuttlefish initially  
8 reacted to the stimulus as they would react to a predator or other form of danger, and that sound  
9 detection could be a mechanism for predator detection in these animals. After several exposures  
10 and no eminent threat, the number of escape responses decreased, suggesting the cuttlefish were  
11 able to filter out the “irrelevant” acoustic stimuli, allowing for a refocusing of sensory  
12 mechanisms.

13         This present study is one of the few measuring habituation in cephalopods and the only  
14 one focusing on habituation to acoustic stimuli. Previous studies using visual stimuli in squid  
15 showed a sharp decrease in the number of jetting responses over the first five minutes but total  
16 inhibition of responses was not observed and the squid continued to show a ring pattern when  
17 exposed to the fish predator models (Long et al. 1989). Those results are very similar to the  
18 results obtained for acoustic habituation in cuttlefish. While both overall response intensities and  
19 the number of escape responses decreased over time, total response inhibition was not observed.  
20 Cuttlefish often ended test series with a startle or “stereotyped startle” response, which seemed to  
21 be a residual startle response and was often limited to a twitch of the median arms. The  
22 continued elicitation of the “stereotyped” response could indicate that sound is an important  
23 source of information for these animals. It may be vital for cuttlefish to keep a certain level of  
24 (neural) vigilance when it comes to gathering acoustic information from the environment and  
25 continuously processing an auditory scene.

26

### 27 **Cephalopod acoustic ecology**

28         Cuttlefish responded to a range of sound levels and frequencies, and response intensities  
29 depended on the sounds to which the animals were exposed. Moreover, cuttlefish showed  
30 habituation to repeated sound stimuli over time. These findings indicate that cuttlefish, and  
31 perhaps cephalopods in general, can use sound as a source of information and have the level of

1 neural development required to process acoustic information from their environment, for  
2 example by selecting or learning which sounds can be “ignored” (i.e., habituation to sound). It  
3 remains unclear, however, what the function of sound is in the lives of cephalopods, especially in  
4 relation to their other well-developed sensory systems, particularly vision. Sound production has  
5 been proposed (Iversen and Perkins, 1963) but remains highly speculative. Defense against  
6 predators (Hanlon and Budelmann, 1987), prey detection, or navigation are possible functions of  
7 sound sensitivity because the natural marine soundscape offers a wide range of natural and  
8 animal sounds. How invertebrates, in general, use sound is not well understood.

9         The results herein also provide some indication of sound-induced directional responses  
10 by the cuttlefish. While the direction of displacements was not measured explicitly, the animals’  
11 locations in the tank were noted at the time of stimulus presentations. During the habituation  
12 experiments, the cuttlefish tended to start testing sessions near the speaker (i.e., a preferred  
13 location). At the start of nearly all second sound stimuli, cuttlefish were located higher in the  
14 water column and farther from speaker, suggesting an initial movement away from the sound  
15 source. This is in agreement with the earlier indications that the observed responses tended to be  
16 avoidance behaviors. From an anatomical perspective, cephalopod statocysts could support  
17 directional hearing. Hair cells of the squid and cuttlefish statocyst are polarized and directionally  
18 oriented (Budelmann, 1979). Directional response movements have already been proposed in  
19 larval invertebrates (Vermeij et al., 2010) but have yet to be shown in adults. The experiments  
20 here were not designed to test the directionality of behavioral responses and follow-up  
21 examinations would best address such a hypothesis.

22         Although the sound frequencies and levels used in this study could be produced by  
23 natural factors, they are also similar to many anthropogenic noises such as shipping, air guns and  
24 drilling (Urick, 1983). Cephalopods may be anatomically impacted by exposures to such sounds,  
25 and may even be stranding as a result of intense sound exposures (André et al., 2011). Yet few  
26 detailed behavioral quantifications exist. Behavioral responses may have significant impacts on  
27 cephalopod populations, even at lower sound levels or more distant exposures. Measuring the  
28 effects of noise from different sources (recordings from shipping or industrial activities, white  
29 noise, etc.) on cephalopod behavior and physiology is important to predict how increasing  
30 anthropogenic noise in the ocean will affect cephalopod populations and their distribution, key  
31 variables because of the importance of cephalopods in marine food webs. Thus, quantifying

1 behavioral responses as well as potential habituation to anthropogenic noise in multiple species  
2 could provide a foundation to understanding how cephalopods may respond to noise exposures.

## 4 **MATERIALS AND METHODS**

### 6 **Experimental overview**

7 Two general experiments were addressed: (1) the frequency range and sound levels  
8 which generated behavioral response and (2) the rate of habituation to pure tones. Animals were  
9 free-swimming in the center of a 1.08 m diameter tank (Fig. 7). To test the range and levels of  
10 responses, a matrix of sound stimuli was devised based upon physiological data (Fig. 1), and ten  
11 animals were presented each sound (a 3 s tone) in a random sequence (with no animal receiving  
12 more than 4 sounds per day). Behavioral responses were recorded using HD video and scored  
13 based upon response type (i.e., inking, jetting, “startle,” color change, fin movement, no  
14 response) and responses were plotted relative to stimulus condition. Habituation trials consisted  
15 of presenting ten individual animals a 3 s tone at 200 Hz every min for 30 trials. Responses were  
16 scored in similar manner and addressed relative to trial number. Calibrations of sound pressure  
17 and particle acceleration were conducted at the beginning and end of the experiments.

### 19 **Animals**

20 Experiments were conducted between January and July 2012. The twenty-two cuttlefish  
21 used for the experiments were hatched and raised at the Marine Biological Laboratory (MBL) in  
22 Woods Hole, MA, USA. Ten animals were used for the first set of experiments addressing  
23 frequency range, sensitivity and habituation (January and February); six “older” cuttlefish  
24 (approximately 1.5 year old) and four juveniles (approximately six months old). This experiment  
25 was designed around a matrix that utilized 10 animals at all exposure levels and frequencies (Fig  
26 1). However, during the first series of experiments, one old cuttlefish and one juvenile died due  
27 to events unrelated to the tests. They were replaced by new individuals of corresponding age; all  
28 animals were included in the analyses (thus, a final  $n = 12$ ). Based upon these results, tests for  
29 frequency range and sensitivity were expanded in July 2012 using ten additional cuttlefish (one  
30 year old). The older animals were accustomed to being handled for visual experiments but were  
31 naïve to acoustic tests; the juveniles had never been used for experiments before. During the

1 testing period, the animals were kept at the Woods Hole Oceanographic Institution (WHOI) in  
2 Woods Hole, MA, USA. Animals were housed individually in partitioned, shallow tanks with a  
3 permanent flow of filtered seawater and were fed defrosted shrimp once a day.

#### 5 **Experimental set-up and protocol**

6 The same basic experimental set-up was used for all tests (Fig. 7). Behavioral response  
7 trials took place in a circular fiberglass tank (inner diameter: 1.08 m, depth: 0.60 m), the inside  
8 of which was painted white. There was a continuous, low flow of filtered seawater to maintain  
9 constant water temperature (14°C) and aerated conditions. Three valves were mounted at  
10 different heights on the outflow pipe to allow for regulation of the water level in the  
11 experimental tank and partial water changes (in the case of inking for example). An acoustically  
12 transparent black plastic net (2 cm mesh size) was strung in a conical shape from the tank rim to  
13 the speaker at the apex. This ensured that the animals swam above the speaker in the water  
14 column and prevented them from settling on the bottom of the tank or the speaker, and from  
15 touching the sidewalls of the tank. The speaker was isolated from the tank by two discs of  
16 closed-cell neoprene (12.7 mm each) to reduce the potential transmission of vibrations from the  
17 speaker to the tank. The tank itself was also isolated from the floor by elevating it on a platform  
18 and adding two sheets of open-cell neoprene (12.7 mm each) between the platform and the tank.  
19 The netting was loosely hooked to the sides of the tank and hung in a conical fashion generally  
20 encouraging the animals toward the center of the tank, but their location could vary. Because the  
21 net only hung loosely and due to the neoprene gaskets, there was little transmission of sound or  
22 vibration to the netting or tank. There was no detectable particle motion from these structures  
23 into the water column (see calibrations below). Care was taken to ensure animals were in the  
24 water column and not touching the sides or netting when we initiated the test tones.

25 Experimental test tones were produced using a UW30 underwater speaker (Lubell Labs  
26 Inc., Columbus, OH, USA). The speaker was connected to a Panasonic CF-52 Toughbook (Bizco  
27 Technologies, Lincoln, NE, USA) with a National Instruments 6062E data acquisition card  
28 (DAQ, Austin, TX, USA) and running a custom program using the National Instruments  
29 LabView software. This program allowed us to control the frequency and intensity of the sound  
30 and the duration of the sound pulses. A PYLE Chopper Series PLA2210 amplifier (Brooklyn,  
31 NY, USA) and a Hewlett-Packard 350D (Palo Alto, CA, USA) attenuator were used to adjust the

1 output from the computer to the speaker. A Tektronix TPS 2014 oscilloscope (Beaverton, OR,  
2 USA) was used to visualize the sound pulses and the signal received by the hydrophone during  
3 calibration. All tests were video recorded using a Sony HDR-XR550 camera (Tokyo, Japan)  
4 placed above the tank and recording at 60 fps.

5 Sixty-seven different tones, including a silent control, were used to determine the  
6 frequency range and sound levels that induced behavioral responses (Fig. 1). These tones lasted  
7 3 s and differed in frequency (80, 100, 150, 200, 250, 300, 400, 500, 700 and 1000 Hz) and  
8 intensity (110, 120, 130, 140, 150, 155, 160 and 165 dB re. 1  $\mu$ PA rms, as calibrated 20 cm away  
9 from the speaker). This initial matrix was based on the physiological responses to sound obtained  
10 from the longfin squid (Mooney et al., 2010). Based on the behavioral results from the first series  
11 of sound tests, an additional set of 10 sound combinations using 700 and 1000 Hz was tested on  
12 10 new animals in July 2012. These animals were housed and tested as described above. At the  
13 highest sound levels, some frequencies were distorted due to characteristics of the speaker; those  
14 sounds were not used for the experiments (blank cells in Fig. 1). Because the animals settled or  
15 swam at different distances from the speaker, the received sound pressure levels differed from  
16 the calibrated ones. Thus, by changing the speaker output levels (in the range noted above) and  
17 the animal varying its location in the tank (swimming and thus the distance to the source), the  
18 received levels ranged from 85 to 188 dB re. 1  $\mu$ Pa rms (considering all frequencies). Unless  
19 stated otherwise, sound pressure levels (SPL) are presented in dB re. 1  $\mu$ Pa rms.

20 Prior to a sound test, the animal was gently moved from the housing tank to the test tank  
21 using a glass container. Before the start of the experiments, the animal was given 1-2 min to  
22 settle. All cuttlefish were tested individually and exposed to four different sounds a day (each  
23 tone lasted 3 s), but each animal was only exposed once to a specific frequency-sound level  
24 combination. The order in which the cuttlefish were tested was randomized every day, with the  
25 condition that there should be at least four trials using other individuals between two consecutive  
26 tests of one animal, leaving enough time for recovery from handling and exposure to sound. By  
27 the end of the testing period (two to three weeks), the animals had been presented each sound (66  
28 sounds in total) and the silent control once in a randomized order.

### 29 30 **Sound calibrations**

1 Both sound pressure and particle motion were calibrated across the diameter and depth of  
2 the tank using the experimental test tones. Calibration measurements were made at the beginning  
3 and end of the experiment with essentially the same results. Experimental tones of all tested  
4 frequencies were recorded at each location. Sound pressure was measured using a calibrated  
5 Reson TC 4014 hydrophone (Slangerup, Denmark) and for the particle acceleration calculations  
6 described in the next paragraph. For basic SPL (dB re 1  $\mu$ Pa rms) the hydrophone was suspended  
7 10 cm from the center of the speaker and then moved to the surface in 10 cm steps. This  
8 procedure was repeated along the diameter of the tank, with horizontal distance from the speaker  
9 increasing in 10 cm increments. The peak-to-peak amplitude of the signals was measured on the  
10 oscilloscope, and converted from voltages to SPL using a custom script. The tones were  
11 concurrently recorded using an Olympus LS-10 PCM pocket recorder (Olympus America Inc.,  
12 Center valley, PA, USA).

13 Particle acceleration values were obtained by measuring the pressure gradient over two  
14 closely spaced sound receivers (Gade, 1982). Two custom hydrophones (sensitivity -180 dB re  
15 1V/ $\mu$ Pa), vertically spaced 5 cm apart, were fixed in a location 10 cm directly above the speaker.  
16 As a stimulus was played pressure measures at both hydrophones was concurrently measured  
17 (sampling rate: 120 kHz) and digitally stored for later analyses. The hydrophone setup was  
18 moved along the diameter and depth of the tank in 10 cm increments as described for the  
19 calibration of the sound pressure level. A total of three depths and 11 positions along the  
20 diameter were used and the hydrophones were placed in three different orientations to record  
21 sound pressure in all three directions at each measuring point. Particle acceleration was  
22 computed from the pressure gradient across the two hydrophones:

$$a = \frac{-\Delta p}{\rho \Delta r} \quad (1)$$

23  
24 where  $\Delta p$  is the magnitude of the difference between the waveforms of the two,  $\rho$  is the density  
25 of the medium and  $r$  is the distance between the hydrophones (Kalmijn, 1988; Wahlberg et al.,  
26 2008). The particle motion was measured in three dimensions by positioning the two  
27 hydrophones along three orthogonal axes. The magnitude of the acceleration was computed and  
28 used for the data analysis and figures. Comparisons of particle acceleration values for the  
29 pressure-derived thresholds were determined by relating the measured pressure at the location



1 with the corresponding particle acceleration at each corresponding location. Within the acoustic  
2 near-field of the speaker, the cuttlefish was expected to act as a rigid body with respect to  
3 particle acceleration values at each location (Denton and Gray, 1982; Coombs et al., 1992).

4 From the calibration results, the actual received sound pressure levels and particle  
5 acceleration values could be calculated as functions of the distance from the animal to the  
6 speaker. Two 15 cm rulers were fixed in the tank: one was placed at water's surface and the  
7 other on the bottom of the tank (51 cm from the water surface). A custom-made MatLab  
8 tracking program was used to get the coordinates of the rulers, speaker, and cuttlefish from the  
9 video frames preceding the sound onset. The ratio of the lengths of both rulers, as observed  
10 vertically by the camera, was calculated using their respective pixel lengths in each video. The  
11 actual size of each animal (mantle length in mm) was measured and its actual depth could  
12 therefore be computed using the sizes of the rulers and the animal's mantle length observed in  
13 the videos. Knowing the actual size of the animal, we could compute its expected pixel length at  
14 the water's surface and compare this to its observed pixel length in each video. The ratio of  
15 observed animal length to expected animal length at the surface, compared to the ratio of the  
16 rulers' lengths, allowed us to calculate the vertical distance from the animal to the speaker. At  
17 the time of stimulus presentation, animals were all horizontal, or near-horizontal, in the typical  
18 swimming position. Horizontal distance from the speaker to the animal's head (between the  
19 eyes) was also determined. Total distance from the speaker to the center of the animal's head  
20 (between the eyes) was computed using the horizontal and vertical distances. This total distance  
21 was then used to calculate the received sound pressure level and particle acceleration at the  
22 animal's head (where the statocysts are located) for each sound test.

23 Sound pressure levels were calibrated at the start of the experiments in January 2012 and  
24 again later in July 2012. The calibrations were found to be similar. Accelerations were calibrated  
25 once, after all the tests were performed.

## 27 **Scoring behavior**

28 The behavioral responses for each cuttlefish at each sound combination were categorized  
29 using six types of response: no response, body pattern change, fin movements, startle, jetting and  
30 inking. Within each type of response, some gradations were defined (Table 1). This scoring  
31 system is based on observations of the animals before the experiments and on previous research

1 on the response of cuttlefish to predators and human-elicited stress (Hanlon and Messenger,  
2 1998; Staudinger et al., 2011).

3 Two behaviors described in Table 1 deserve more extensive explanations: the deimatic  
4 pattern and the startle response. The deimatic display is usually observed in experiments  
5 involving visual stimuli (Langridge, 2009; Mather, 2010; Staudinger et al., 2011); it is  
6 considered a threat (or startle) display to deter potential predators (Staudinger et al, in press) and  
7 is defined by a flattened body shape, paling of the skin, the presence of paired, dark mantle spots,  
8 a dark fin line, dark eye rings and a dilation of the pupil (Hanlon and Messenger, 1988; Hanlon  
9 and Messenger, 1998). The startle response has been described for several taxa, mostly  
10 vertebrates and insects (Hoy et al., 1989; Pilz and Schnitzler, 1996; Koch, 1999; Kastelein et al.,  
11 2008) and is provoked by an intense and unexpected stimulus, has a short delay, and involves a  
12 fast motor response including escape responses and subtler movement such as eye blinks (Hoy et  
13 al., 1989; Koch, 1999; Götz and Janik, 2011). Based on these descriptions of the startle response,  
14 we defined one of the responses in *Sepia officinalis* as a startle response. During the habituation  
15 tests (see below), we observed a decrease in startle response intensity and termed this the  
16 “stereotyped startle” response (Table 1). The notion of “stereotyped” is preferred to “reflex” in  
17 this case because of the lack of neurological investigation.

18

### 19 **Habituation to repeated sounds**

20 Two weeks after the initial behavioral responses tests, 10 animals were tested for  
21 potential habituation to sound stimuli. Animals were divided into two groups and exposed to  
22 repeated 200 Hz, 3 s tones, presented every minute for 30 minutes. This frequency was chosen  
23 because of the general sensitivity and diversity of responses it elicited in the first series of  
24 experiments. Responses to two sound intensities were compared using calibrated sound levels of  
25 150 and 165 dB. Each of the two groups consisted of three old animals and two young ones. The  
26 first group started with the sound at 165 dB on the first day and received the 150 dB sound on the  
27 second day; the second group got the opposite treatment. As for previous behavioral trials,  
28 exposure levels were corrected for the distance of the animal to the speaker. Tests were  
29 performed with 30 to 45 stimuli and behaviors were recorded and scored as noted above.  
30 Standard regression analyses were used to estimate the relationship between trial number and  
31 rate of occurrence of the different response types.

1  
2  
3  
4  
5  
6  
7  
8  
9  
10  
11  
12  
13  
14  
15  
16  
17  
18  
19  
20  
21  
22  
23  
24  
25

## **ACKNOWLEDGEMENTS**

We thank Kimberly Ulmer, Kendra Buresch, Liese Siemann and other members of the Hanlon Lab for providing advice on husbandry and experimental set-up. Thanks also to Vicke Starczak, Jesús Pineda and Michael Moore from WHOI for suggestions on experimental design and analyses. Scott Gallager, Houshou Jiang and Gareth Lawson lent us the facilities space. Members of Mooney’s SPASE Lab assisted with the experiments at various stages, including Margot Wilsterman, Max Kaplan, Amy Streets, and Samantha Zacarias. Rick Galat, Joe, Ed, Steve Allsopp, Kristopher Newhall and Jim Dunn helped make the tank and seawater adjustments. Thanks to Sander Kranenbarg, Henk Schipper and Kees Voesenek from the Experimental Zoology Group at the Wageningen University for their help with the MatLab program. Words 6729.

## **COMPETING INTERESTS**

The authors declare no competing interests.

## **AUTHOR CONTRIBUTIONS**

J.E.S. and T.A.M. designed the experiments, collected the data, and conducted the analyses. S.W.S.G. and R.T.H. assisted with the data analyses and writing the paper.

## **FUNDING**

The work was initially posed through a MBL Grass Fellowship to TAM. Funding was provided by the Sholley Foundation (for RTH) and WHOI’s Ocean Life Institute.

## 1 REFERENCES

- 2 **André, M., Solé, M., Lenoir, M., Durfort, M., Quero, C., Mas, A., Antoni Lombarte,**  
3 **Schaar, M. v. d., López-Bejar, M., Morell, M. et al.** (2011). Low-frequency sounds induce  
4 acoustic trauma in cephalopods. *Frontiers in Ecology and Evolution* **9**, 489-493.
- 5 **Au, W. W. L. and Hastings, M. C.** (2009). Principles of marine bioacoustics. New York:  
6 Springer.
- 7 **Au, W. W. L., Popper, A. N. and Fay, R. J.** (2000). Hearing by whales and dolphins, pp. 512.  
8 New York: Springer-Verlag.
- 9 **Baglioni, S.** (1910). Zur Kenntnis der Leistungen einiger Sinnesorgane (Gesichtssinn, Tastsinn  
10 und Geruchssinn) und des Zentralnervensystems der Zephalopoden und Fische. *Z. Biol.* **53**, 255-  
11 286 (cited in Hanlon and Budelmann, 1987).
- 12 **Bleckmann, H., Budelmann, B. U. and Bullock, T. H.** (1991). Peripheral and central nervous  
13 responses evoked by small water movements in a cephalopod. *Journal of Comparative*  
14 *Physiology A* **168**, 247-257.
- 15 **Budelmann, B. U.** (1979). Hair cell polarization in the gravity receptor systems of the statocysts  
16 of the cephalopods *Sepia officinalis* and *Loligo vulgaris*. *Brain Research* **160**, 261-270.
- 17 **Budelmann, B. U.** (1990). The statocysts of squid. In *Squid as experimental animals*, eds. D. L.  
18 Gilbert W. J. Adelman and J. M. Arnold), pp. 421-442. New York: Plenum Press.
- 19 **Budelmann, B. U.** (1992a). Hearing in non-arthropod invertebrates. In *The evolutionary biology*  
20 *of hearing*, eds. D. B. Webster R. R. Fay and A. N. Popper), pp. 141-155. New York: Springer-  
21 Verlag.
- 22 **Budelmann, B. U.** (1992b). Hearing in crustacea. In *The evolutionary biology of hearing*, eds.  
23 D. B. Webster R. R. Fay and A. N. Popper), pp. 131-140. New York: Springer-Verlag.
- 24 **Budelmann, B. U. and Bleckmann, H.** (1988). A lateral line analogue in cephalopods: water  
25 waves generated microphonic potentials in the epidermal head and lines of *Sepia* and  
26 *Lolliguncula*. *Journal of Comparative Physiology. A, Sensory, Neural, and Behavioral*  
27 *Physiology* **164**, 1-5.
- 28 **Cartron, L., Shashar, N., Dickel, L. and Darmaillacq, A.-S.** (2013). Effects of stimuli shape  
29 and polarization in evoking deimatic patterns in the European cuttlefish, *Sepia officinalis*, under  
30 varying turbidity conditions. *Invertebrate Neuroscience* **13**, 19-26.

- 1 **Coombs, S., Janssen, J. and Montgomery, J.** (1992). Functional and evolutionary implications  
2 of peripheral diversity in lateral line systems. In *The evolutionary biology of hearing*, eds. D. B.  
3 Webster R. J. Fay and A. N. Popper), pp. 267-294. New York: Springer-Verlag.
- 4 **Denton, E. J. and Gray, J. A. B.** (1982). The rigidity of fish and patterns of lateral line  
5 stimulation. *Nature* **297**, 679 - 681.
- 6 **Dijkgraaf, S.** (1963). Verusche uber Schallwahrnehmung bei Tintenfischen.  
7 *Naturwissenschaften* **50**, 50.
- 8 **Fay, R. R. and Popper, A.** (1998). Comparative hearing: fish and amphibians, pp. 456. New  
9 York: Springer.
- 10 **Fewtrell, J. L. and McCauley, R. D.** (2012). Impact of air gun noise on the behavior of marine  
11 fish and squid. *Marine Pollution Bulletin* **64**, 984-993.
- 12 **Fewtrell, J. L. and McCauley, R. D.** (2012 ). Impact of air gun noise on the behaviour of  
13 marine fish and squid. *Marine Pollution Bulletin* **64**, 984-993.
- 14 **Finneran, J. J. and Schlundt, C. E.** (2011). Subjective loudness level measurements and equal  
15 loudness contours in a bottlenose dolphin (*Tursiops truncatus*). *Journal of the Acoustical Society*  
16 *of America* **130**, 3124–3136.
- 17 **Gade.** (1982). Sound intensity (Part I. Theory). *Briuel & Kjaer Technical Review* **3**, 3-39.
- 18 **Götz, T. and Janik, V. M.** (2011). Repeated elicitation of the acoustic startle reflex leads to  
19 sensitization in subsequent avoidance behavior and induces fear conditioning. *BMC*  
20 *Neuroscience* **12**, 12.
- 21 **Hanlon, R. and Budelmann, B. U.** (1987). Why cephalopods are probably not "deaf". *American*  
22 *Naturalist* **129**, 312-317.
- 23 **Hanlon, R. and Messenger, J. B.** (1998). Cephalopod behavior. New York: Cambridge  
24 University Press.
- 25 **Hanlon, R. T. and Messenger, J. B.** (1988). Adaptive coloration in young cuttlefish (*Sepia*  
26 *officinalis* L.): the morphology and development of body patterns and their relation to behavior.  
27 *Philosophical Transactions of the Royal Society of London, B: Biological Sciences* **320**, 437-487.
- 28 **Hoy, R., Nolen, T. and Brodfuehrer, P.** (1989). The neuroethology of acoustic startle and  
29 escape in flying insects. *Journal of Experimental Biology* **146**, 287-306.
- 30 **Iversen, R. T. S. and Perkins, P. J.** (1963). An Indication of Underwater Sound Production by  
31 Squid. *Nature* **199**, 250-251.

- 1 **Kaifu, K., Segawa, S. and Tsuchiya, K.** (2007). Behavioral responses to underwater sound in  
2 the small benthic octopus *Octopus ocellatus*. *Journal of the Marine Acoustics Society of Japan*  
3 **34** 266-273
- 4 **Kaifu, K., Akamatsu, T. and Segawa, S.** (2008). Underwater sound detection by cephalopod  
5 statocyst. *Fisheries Science* **74**, 781-786.
- 6 **Kalmijn, A. D.** (1988). Acoustic and hydrodynamic field detection. In *Sensory biology of*  
7 *aquatic animals*, eds. J. Atema R. R. Fay A. N. Popper and W. N. Tavolga), pp. 83-131. New  
8 York: Springer-Verlag.
- 9 **Kastelein, R. A., Wensveen, P. J., Terhune, J. M. and Jong, C. A. F. d.** (2011). Near-  
10 threshold equal-loudness contours for harbor seals (*Phoca vitulina*) derived from reaction times  
11 during underwater audiometry: A preliminary study. *Journal of the Acoustical Society of*  
12 *America* **129**, 488–495.
- 13 **Kastelein, R. A., van der Heul, S., Verboom, W. C., Jennings, N., van der Veen, J. and de**  
14 **Haan, D.** (2008). Startle response of captive North Sea fish species to underwater tones between  
15 0.1 and 64 kHz. *Marine Environmental Research* **65**, 369-377.
- 16 **King, A. J. and Adamo, S. A.** (2006). The ventilatory, cardiac and behavioural responses of  
17 resting cuttlefish (*Sepia officinalis*) to sudden visual stimuli. *Journal of Experimental Biology*  
18 **209**, 1101-1111.
- 19 **Koch, M.** (1999). The neurobiology of startle. *Progress in Neurobiology* **59**, 107-128.
- 20 **Komak, S., Boal, J. G., Dickel, L. and Budelmann, B. U.** (2005). Behavioural responses of  
21 juvenile cuttlefish (*Sepia officinalis*) to local water movements. *Marine and Freshwater*  
22 *Behavior and Physiology* **38**, 117-125.
- 23 **Langridge, K. V.** (2009). Cuttlefish use startle displays, but not against large predators. *Animal*  
24 *Behavior* **77**, 847-856.
- 25 **Langridge, K. V., Broom, M. and Osorio, D.** (2007). Selective signaling by cuttlefish to  
26 predators. *Current Biology* **17**, R1044-R1045.
- 27 **Mann, D. A., Casper, B. M., Boyle, K. S. and Tricas, T. C.** (2007). On the attraction of larval  
28 fishes to reef sounds. *Marine Ecology Progress Series* **338**, 307-310.
- 29 **Mather, J. A.** (2010). Vigilance and antipredator responses of Caribbean reef squid. *Marine and*  
30 *Freshwater Behaviour and Physiology* **43**, 357-370.

- 1 **Mooney, T., Hanlon, R. T., Christensen-Dalsgaard, J., Madsen, P. T., Ketten, D. R. and**  
2 **Nachtigall, P. E.** (2012). The potential for sound sensitivity in cephalopods. In *The Effects of*  
3 *Noise on Aquatic Life*, eds. A. N. Popper and A. D. Hawkins), pp. 125-128. New York: Springer  
4 Science+Business Media, LLC.
- 5 **Mooney, T. A., Hanlon, R. T., Christensen-Dalsgaard, J., Madsen, P. T., Ketten, D. R. and**  
6 **Nachtigall, P. E.** (2010). Hearing by the longfin squid (*Loligo pealeii*) studied with auditory  
7 evoked potentials: Sensitivity to low-frequency particle motion and not pressure. *Journal of*  
8 *Experimental Biology* **213**, 3748-3759.
- 9 **Packard, A., Karlsen, H. E. and Sand, O.** (1990). Low frequency hearing in cephalopods.  
10 *Journal of Comparative Physiology A* **166**, 501-505.
- 11 **Pilz, P. K. D. and Schnitzler, H.-U.** (1996). Habituation and sensitization of the acoustic startle  
12 response in rats: amplitude, threshold, and latency measures. *Neurobiology of Learning and*  
13 *Memory* **66**, 67-79.
- 14 **Popper, A. N. and Fay, R. R.** (2011). Rethinking sound detection by fishes. *Hearing Research*  
15 **273**, 25-36.
- 16 **Rankin, C. H., Abrams, T., Barry, R. J., Bhatnagar, S., Clayton, D. F., Colombo, J.,**  
17 **Coppola, G., Geyer, M. A., Glanzman, D. L., Marsland, S. et al.** (2009). Habituation  
18 revisited: An updated and revised description of the behavioral characteristics of habituation.  
19 *Neurobiology of Learning and Memory* **92**, 135–138.
- 20 **Simpson, S., Radford, A., Tickle, E., Meekan, M. and Jeffs, A.** (2011). Adaptive avoidance of  
21 reef noise. *PLoS ONE* **6**, e16625.
- 22 **Stanley, J., Radford, C. A. and Jeffs, A.** (2011). Behavioural response thresholds in New  
23 Zealand crab megalopae to ambient underwater sound. *PLoS ONE* **6**, e28572.
- 24 **Stanley, J. A., Radford, C. A. and Jeffs, A. G.** (2009). Induction of settlement in crab  
25 megalopae by ambient underwater reef sound. *Behavioral Ecology* **21**, 113-120.
- 26 **Stanley, J. A., Radford, C. A. and Jeffs, A. G.** (2012). Location, location, location: finding a  
27 suitable home among the noise. *Proceedings of the Royal Society B: Biological Science* **279**,  
28 3622-3631.
- 29 **Staudinger, M. D., Hanlon, R. T. and Juanes, F.** (2011). Primary and secondary defences of  
30 squid to cruising and ambush predators: variable tactics and their survival value. *Animal*  
31 *Behaviour* **81**, 585-594.

- 1 **Stebbins, W. C.** (1966). Auditory reaction time and derivation of equal loudness contours for the  
2 monkey. *Journal of the Experimental Analysis of Behavior* **9**, 135–142.
- 3 **Urick, R. J.** (1983). Principles of underwater sound. New York: Mc-Graw-Hill.
- 4 **Vermeij, M. J. A., Marhaver, K. L., Huijbers, C. M., Nagelkerken, I. and Simpson, S. D.**  
5 (2010). Coral larvae move toward reef sounds. *PLoS ONE* **5**, e10660.
- 6 **Wahlberg, M., Schack, H., Wilson, M., Bejder, L. and Madsen, P. T.** (2008). Particle  
7 acceleration noise generated by boats. *Bioacoustics* **17 (Special Issue)**, 148-150.
- 8 **Webster, D. B., Fay, R. R. and Popper, A. N.** (1992). The evolutionary biology of hearing, pp.  
9 591. New York: Springer-Verlag.

10

11



## 1 TABLES

2

3 **Table 1** Overview of the types of responses and their intensities used to score the behavioral  
 4 responses of *Sepia officinalis* to sound stimuli

| Response type       | Intensity     | Description                                                                                                                                                                                                                                     |
|---------------------|---------------|-------------------------------------------------------------------------------------------------------------------------------------------------------------------------------------------------------------------------------------------------|
| No response         | -             | No change in behavior observed, no acceleration or deceleration in fin movement, no body pattern change or flickering of chromatophores, no displacement.                                                                                       |
| Body pattern change | Small         | Body pattern change covering less than half the body area.                                                                                                                                                                                      |
|                     | Big           | Body pattern change covering at least half the body area, includes dark flashing, bleaching, deimatic, etc.                                                                                                                                     |
|                     | Deimatic      | Body pattern including some or all of the following: flattened body shape, paling of the skin, paired dark mantle spots, dark fin line, dark eye rings, pupil dilation.                                                                         |
| Fin movements       | Slow          | Slow fin undulations resulting in slow displacements (undulation rate estimated to be less than 1 Hz).                                                                                                                                          |
|                     | Fast          | Intense fin undulations resulting in rapid, marked displacements (undulation rate estimated to be more than 1 Hz).                                                                                                                              |
| Startle             | Small         | Small contraction of the mantle and/or arms, often followed by slow fin movements with or without displacement.                                                                                                                                 |
|                     | Big           | Big, marked contraction of the mantle and arms, usually followed by big displacements and/or jetting.                                                                                                                                           |
|                     | “Stereotyped” | Arm twitch, sometimes with a small mantle contraction. The arms go back to their initial position immediately after the response. In some cases, the arms only twitch at the tips and a contraction of the pupils is observed. No displacement. |
| Jetting             | Small         | Small jet(s), distance covered is less than two body                                                                                                                                                                                            |

|        |            |                                                                                                                        |
|--------|------------|------------------------------------------------------------------------------------------------------------------------|
|        |            | lengths, speed is relatively slow. The number of jets was also recorded.                                               |
|        | Big        | Big jet(s), distance covered is at least two body lengths, displacement is fast. The number of jets was also recorded. |
| Inking | -          | Expulsion of ink. The number of inking events was also recorded.                                                       |
| Other  | Elongating | Body is stretched along the longitudinal axis, especially the arms are stretched.                                      |

1  
2  
3  
4

1 **Table 2** Logarithmic regression statistics to evaluated response occurrence rates vs. trial number

| Sound level | Response type      | Line equation                   | r <sup>2</sup> | <i>p</i> | n  |
|-------------|--------------------|---------------------------------|----------------|----------|----|
| high        | jetting            | $y = -2.32 \cdot \ln(x) + 8.03$ | 0.72           | < 0.001  | 30 |
|             | inking             | $y = -0.81 \cdot \ln(x) + 2.42$ | 0.6            | < 0.001  | 30 |
|             | large color change | $y = -0.78 \cdot \ln(x) + 3.97$ | 0.25           | < 0.05   | 30 |
| low         | jetting            | $y = -1.72 \cdot \ln(x) + 6.16$ | 0.7            | < 0.001  | 30 |
|             | inking             | $y = -0.50 \cdot \ln(x) + 1.54$ | 0.42           | < 0.01   | 30 |
|             | large color change | $y = -0.99 \cdot \ln(x) + 3.74$ | 0.49           | < 0.001  | 30 |

2

1 **FIGURE CAPTIONS**

2

3 **Figure 1. Matrix of the behavioral responses of an individual cuttlefish to different sounds.**

4 The matrix reflects the stimuli presented as part of the experimental design. The responses  
5 shown are from 1.5-year old cuttlefish for the frequencies between 80 and 500 Hz, and from a  
6 different, one-year old animal for 700 and 1000 Hz. The blank cells indicate sound combinations  
7 that were not played due to technical limitations of the set-up. NR: no response. The control is  
8 not represented in the matrix. SPL: sound pressure level dB re 1  $\mu$ Pa.

9

10 **Figure 2. Types of behavioral responses to sound.** These frames are extracted from one test  
11 and illustrate how different behavioral responses can be combined. A: Cuttlefish at rest in the  
12 experimental tank before the sound stimulus. The median arms are dark and are held backward  
13 over the head. B: Jetting and inking. C: Large body pattern change (darkening) and fast fin  
14 movements resulting in a displacement of the animal after having jetted away.

15

16 **Figure 3. Received particle accelerations and the behavioral responses they elicited.** Only  
17 the highest scoring behaviors for each sound test are represented here (i.e. not all occurrences of  
18 each response types are shown). Large body pattern/fin: large body pattern change and/or fast fin  
19 movements, Small body pattern/fin: small body pattern change and/or slow fin movements. The  
20 dashed lines represent the mean acceleration value for that response.

21

22 **Figure 4. Mean (A: acceleration; B: sound pressure) behavioral responses.** Only the highest  
23 scoring behaviors for each sound test are represented here. At lower frequencies (below 500 Hz),  
24 the escape responses (jetting, inking and large body pattern change) were elicited at higher sound  
25 levels. Above 500 Hz a relatively high sound level was needed to induce any type of response.

26

27 **Figure 5. Habituation to a repeated sound stimulus.** Data were collected using a 200 Hz tone  
28 at 165 dB (calibrated sound pressure), which was presented every minute for 30 consecutive  
29 trials. The occurrence of both response types (inking and jetting) decreased logarithmically;  
30 details in Table 2 (high sound level). N = 10 cuttlefish.

31

1 **Figure 6. Succession of behavioral responses of two individual cuttlefish.** A 200 Hz tone was  
2 presented every minute for 30 consecutive trials. A: old animal (1.5-year old), B: young animal  
3 (6 months old). Black symbols represent the responses to the first test series; grey symbols  
4 represent the responses to the second test series.

5  
6 **Figure 7. Experimental set-up.** A: Schematic side view. 1: tank, 2: net, 3: speaker, 4:  
7 calibration ruler, 5: outflow pipe, 6: HD video camera. B: Detail from a video as recorded by the  
8 HD camera above the tank.

9  
10  
11

1 **FIGURES**

2

3 **Figure 1**

4

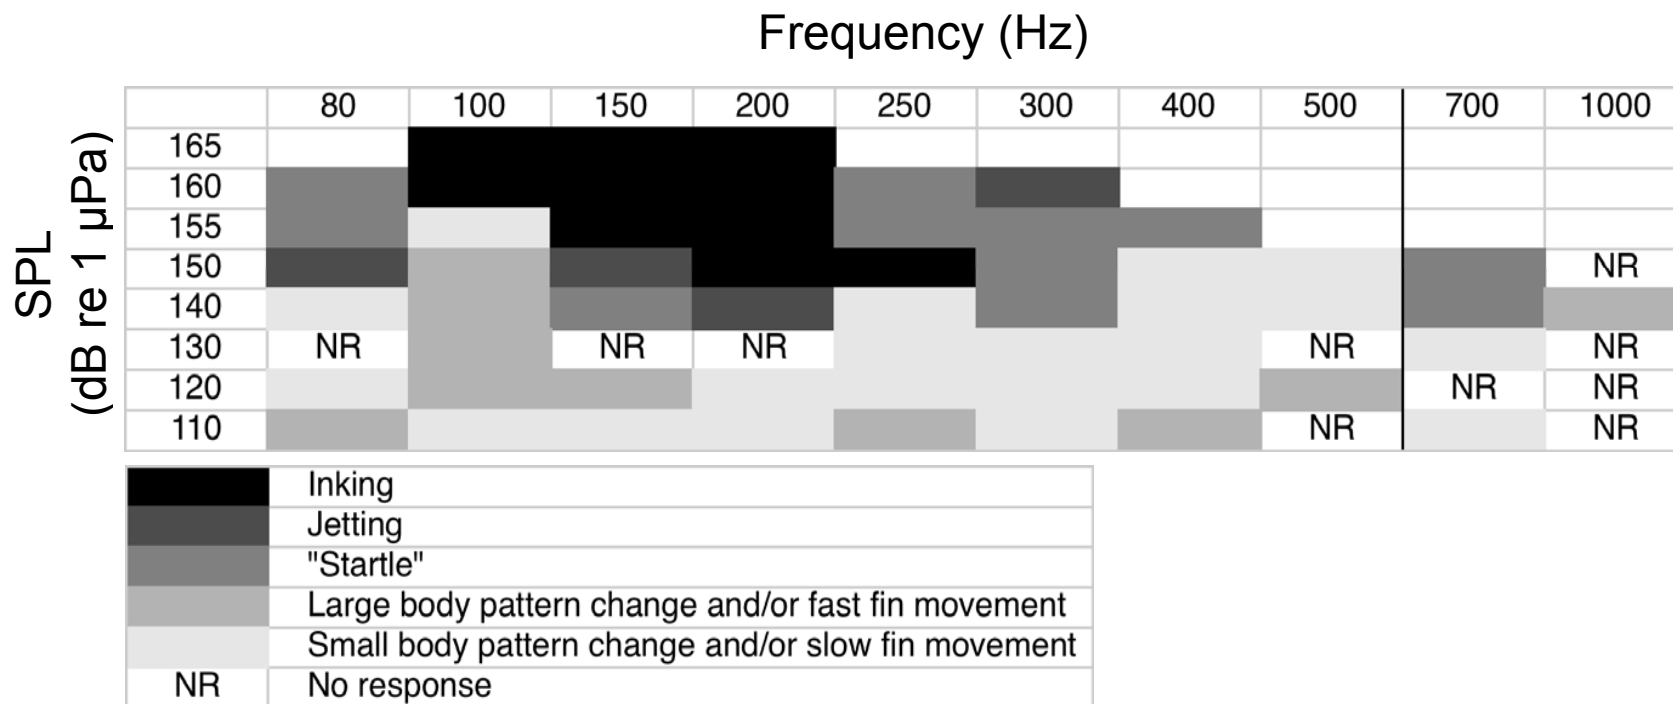

5

6

7

1 **Figure 2**

2

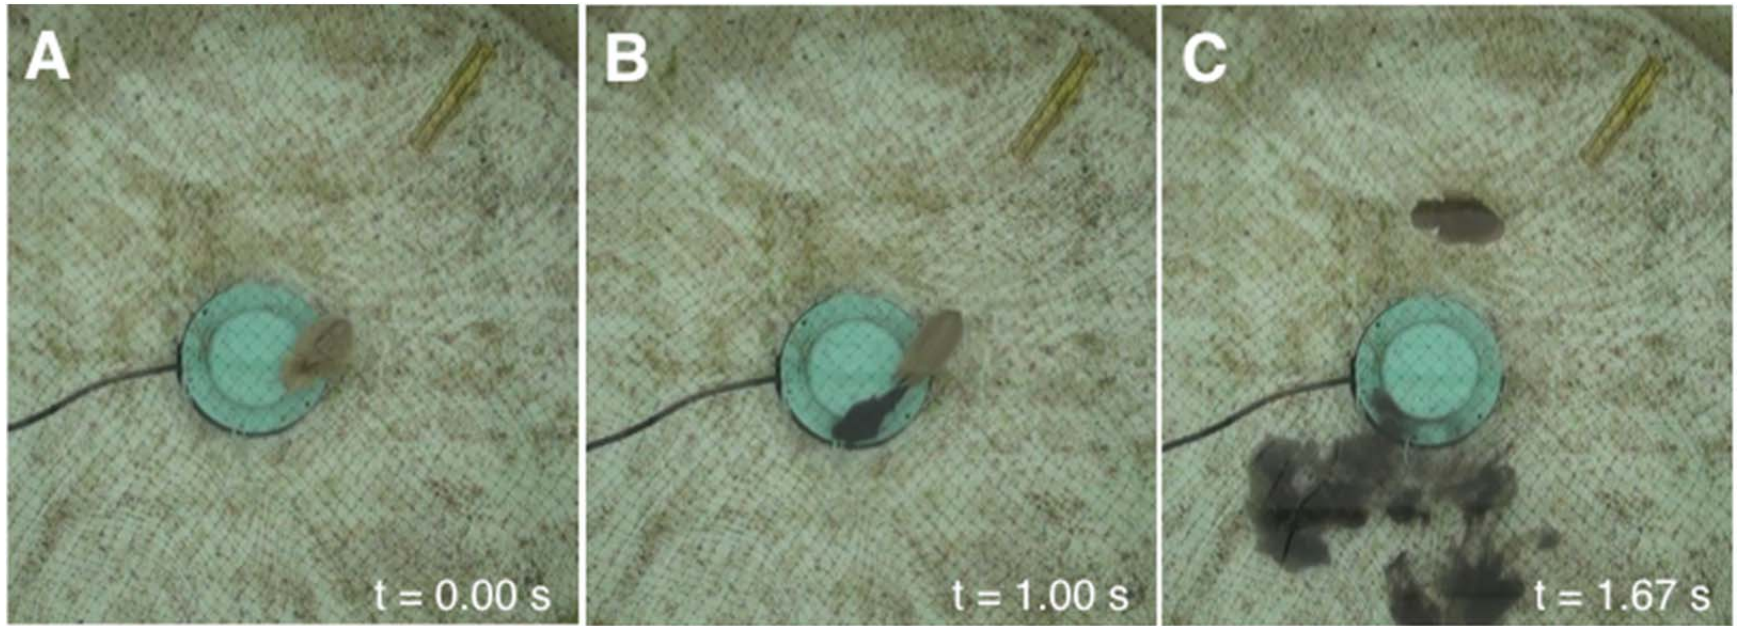

3

4

5

1 **Figure 3**

2

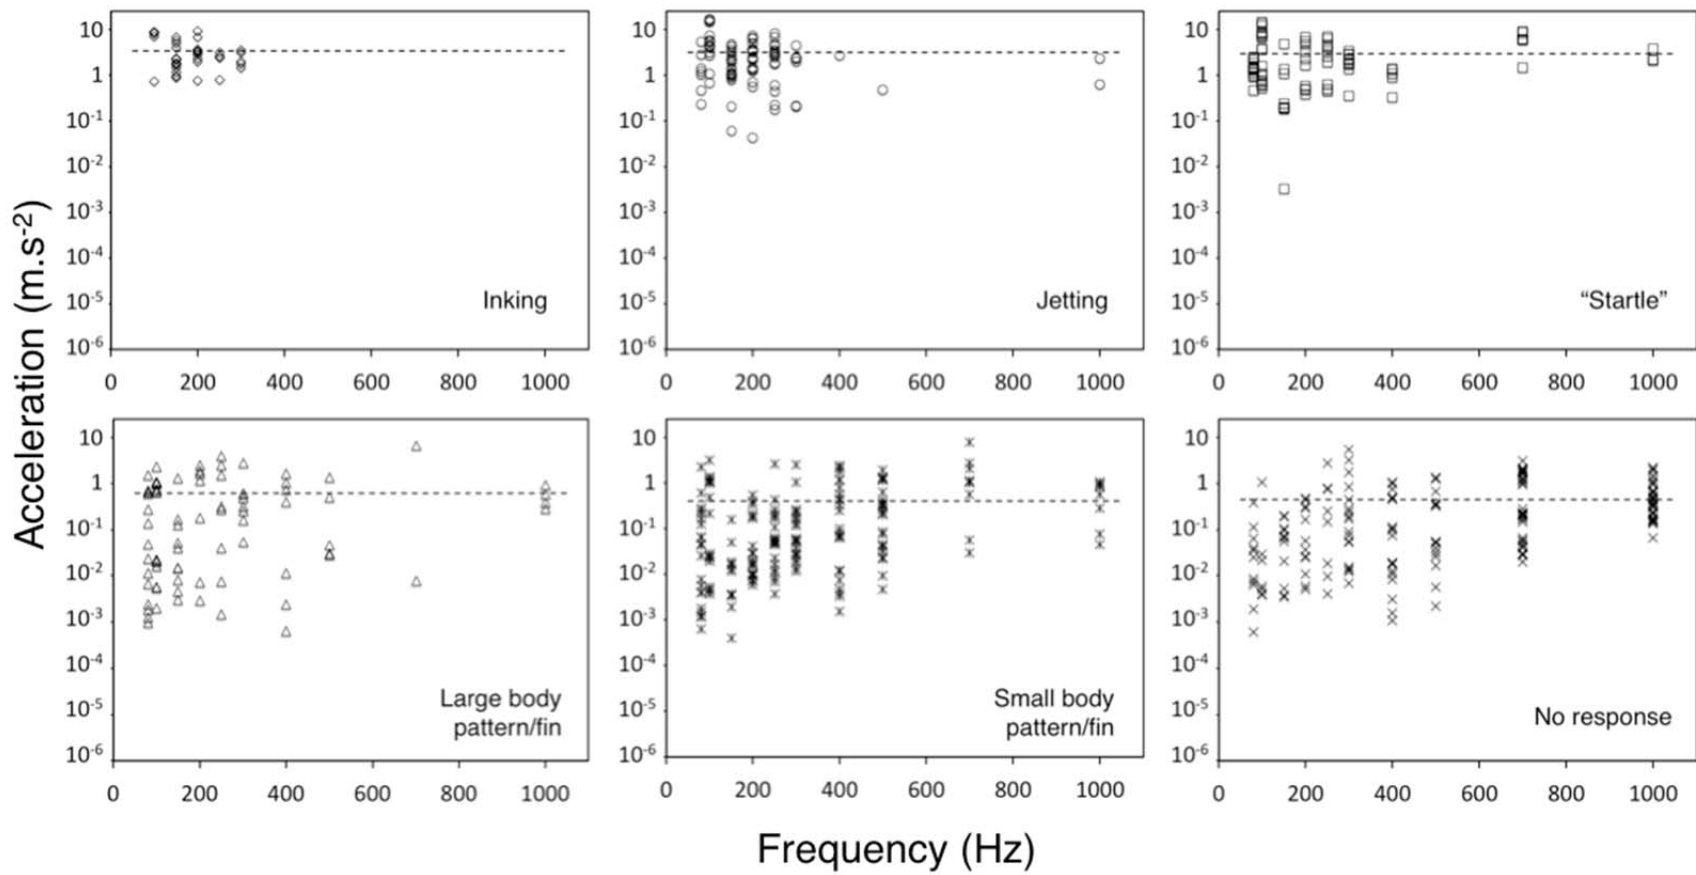

3



1 **Figure 4**

2

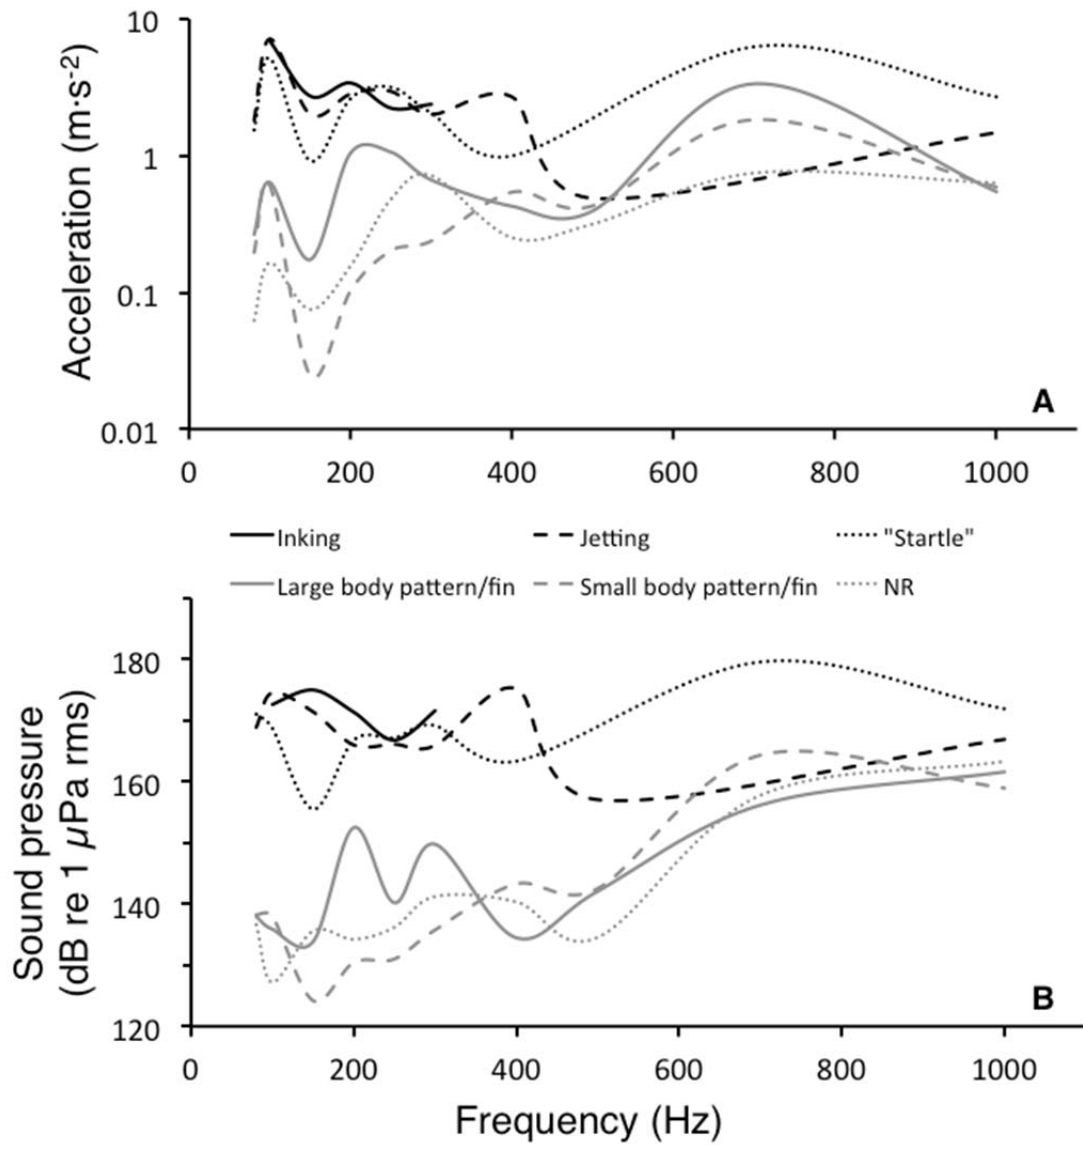

3

1 **Figure 5**

2

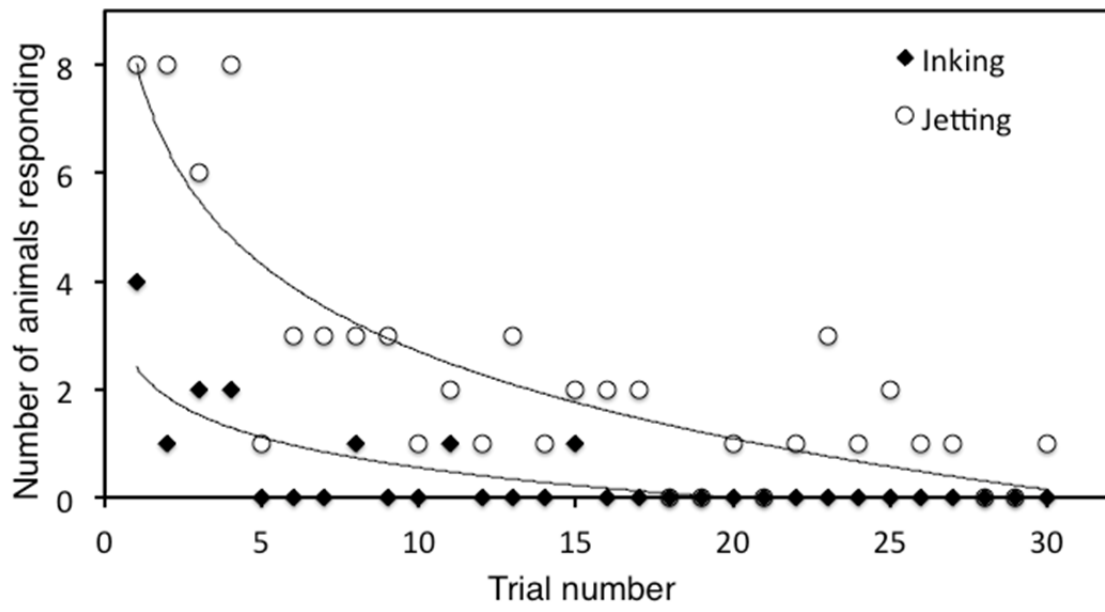

3

4

5

1 **Figure 6**

2

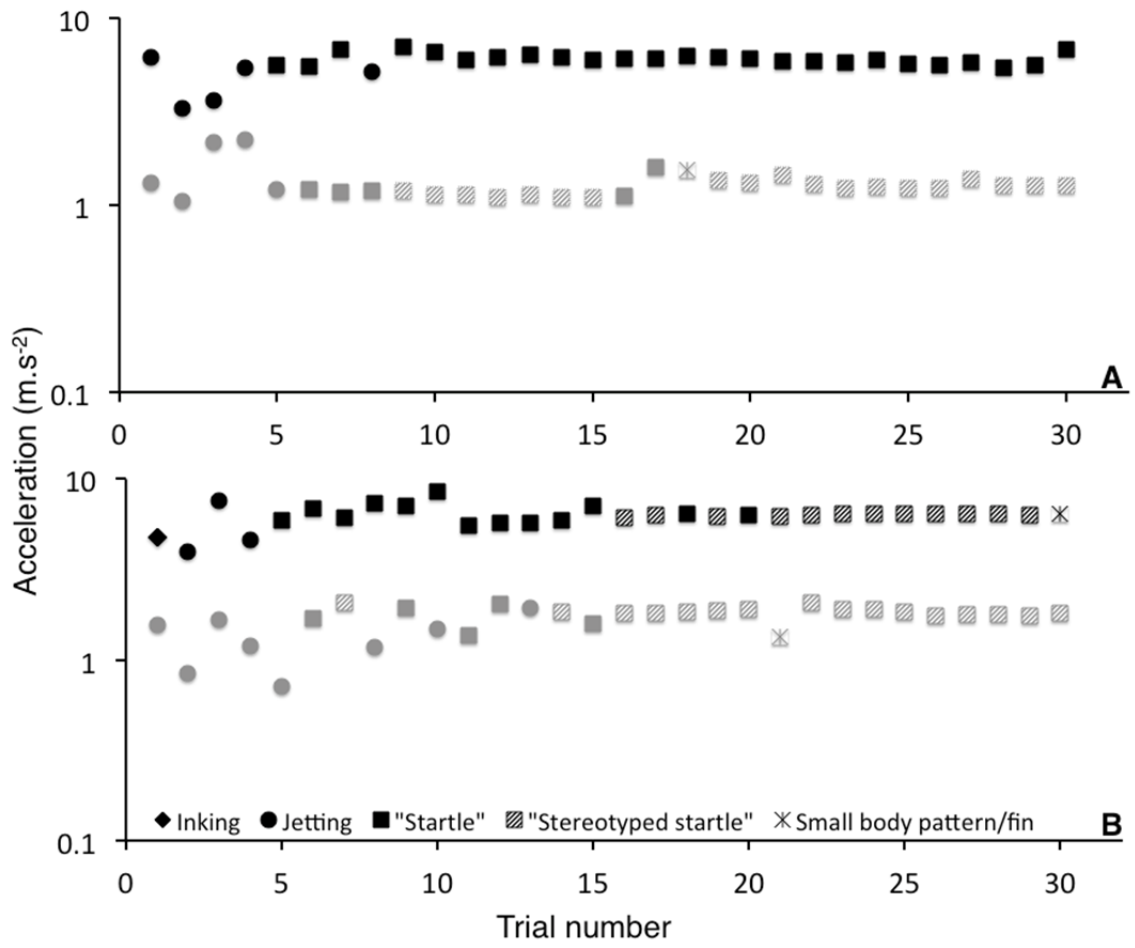

3

4

1 **Figure 7**

2

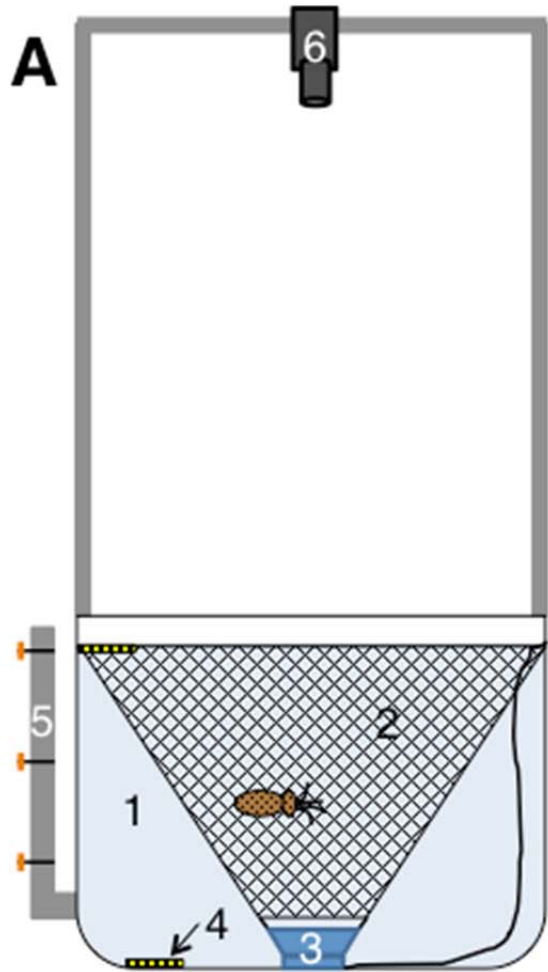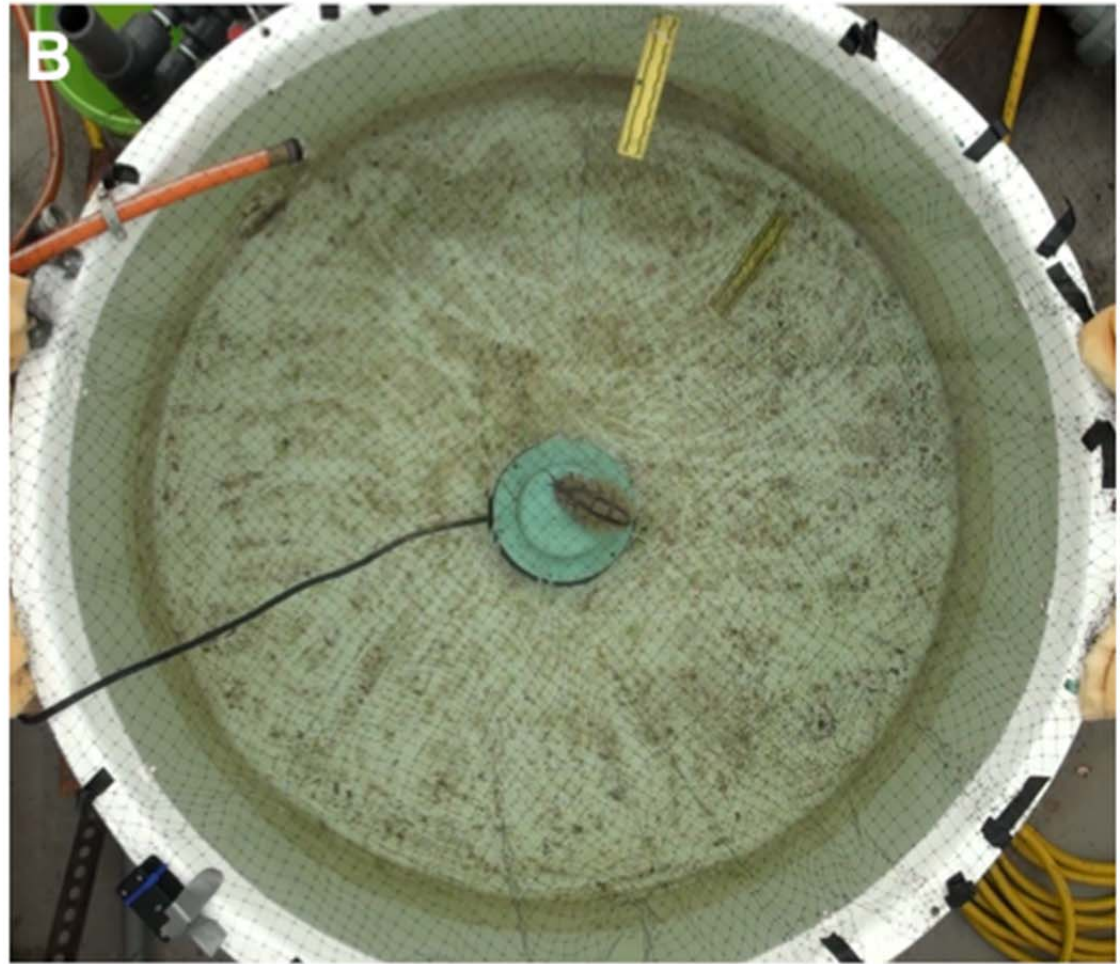

3

4
